# Supplementary material for: Overcoming effector T cell exhaustion in ovarian cancer ascites with a novel adenovirus encoding for a MUC1 bispecific antibody engager and IL-2 cytokine
Source: PubMed Central journal article supplement (PMC11403222; doi:10.1016/j.ymthe.2024.06.029), 2024-06-22
Supplement: mmc1.pdf [file mmc1.pdf]

## **Supplemental Information**

### **Overcoming effector T cell exhaustion in ovarian cancer ascites with a novel adenovirus encoding for a MUC1 bispecific antibody engager and IL-2 cytokine**

**Saru Basnet, Mirte Van der Heijden, Dafne C.A. Quixabeira, Elise Jirovec, Susanna A.M. Grönberg-Vähä-Koskela, James H.A. Clubb, Anna Kanerva, Santeri Pakola, Lyna Haybout, Victor Arias, Otto Hemminki, Tatiana Kudling, Sadia Zafar, Victor Cervera-Carrascon, Joao M. Santos, and Akseli Hemminki**

**Table S1. List of antibodies used in this study.**

| Experiment                                                                       | Antibodies                                             | Manufacturer                         |
|----------------------------------------------------------------------------------|--------------------------------------------------------|--------------------------------------|
| T cell activation assay (in vitro) and immunological analysis of tumor (in vivo) | FITC anti-human CD3 (clone OKT3)                       | Biolegend, California, USA           |
|                                                                                  | AF-700 anti- human CD4 (clone A161A1)                  |                                      |
|                                                                                  | BV-421 anti- human CD8 (clone SK1)                     |                                      |
|                                                                                  | PE-Cy <sup>TM</sup> 7 anti- human CD69 (clone FN50)    |                                      |
|                                                                                  | PE-Cy <sup>TM</sup> 5 anti- human CD25 (clone M-A251)  | BD Sciences, New Jersey, USA         |
|                                                                                  | PE-CF594 anti-human CD127 (clone HIL-7R-M21)           |                                      |
|                                                                                  | APC anti-human Tbet (clone 4B10)                       |                                      |
|                                                                                  | PE anti-human EOMES (clone X4-83)                      |                                      |
| Expression of cell surface MUC1 antigen                                          | APC anti-human MUC1 (clone 16A)                        | Biolegend, California, USA           |
| Profiling of NK and NK-T like cells                                              | BV-605 anti-human CD56 (HCD56)                         | Biolegend, California, USA           |
| Activation of $\gamma\delta$ T cell                                              | PE anti-human TCR- $\gamma\delta$ (clone 11F2)         | Miltenyi, Bergisch Gladbach, Germany |
|                                                                                  | FITC anti-human V $\delta$ 1 (clone REA173)            |                                      |
|                                                                                  | APC anti-human V $\delta$ 2 (clone REA771)             |                                      |
|                                                                                  | AF-700 Perforin (clone B-D48)                          |                                      |
|                                                                                  | BV421 GranzymeB (clone GB11)                           | BD Sciences, New Jersey, USA         |
|                                                                                  | BV650 Interferon gamma (clone 4S.B3)                   | Biolegend, California, USA           |
| T cell exhaustion panel                                                          | FITC anti-human CD3 (clone OKT3)                       | BioLegend, California, USA           |
|                                                                                  | AF-700 anti-human CD4 (clone A161A1)                   |                                      |
|                                                                                  | BV-510 anti-human CD8 (clone SK1)                      | BD Sciences, New Jersey, USA         |
|                                                                                  | PE anti-human TIM-3 (clone A18087E)                    | BioLegend, California, USA           |
|                                                                                  | BV-605 anti-human TIGIT (clone A15153G)                |                                      |
|                                                                                  | PE anti-human TIM-3 (clone A18087E)                    |                                      |
|                                                                                  | BV-605 anti-human TIGIT (clone A15153G)                |                                      |
|                                                                                  | PE-Cy <sup>TM</sup> 5 anti-human LAG-3 (clone 11C3C65) |                                      |
|                                                                                  | PE-Cy7 anti-human BTLA (clone MIH26)                   |                                      |
|                                                                                  | APC anti-human CTLA-4 (clone BNI3)                     |                                      |
|                                                                                  | PE-CF594 anti-human PD-1 (clone NAT105)                |                                      |
|                                                                                  | PE anti-human TOX (clone TXRX10)                       | Invitrogen, Massachusetts, USA       |
|                                                                                  | BV-421 anti-human TCF-1 (clone S33-966)                | BD Sciences, New Jersey, USA         |

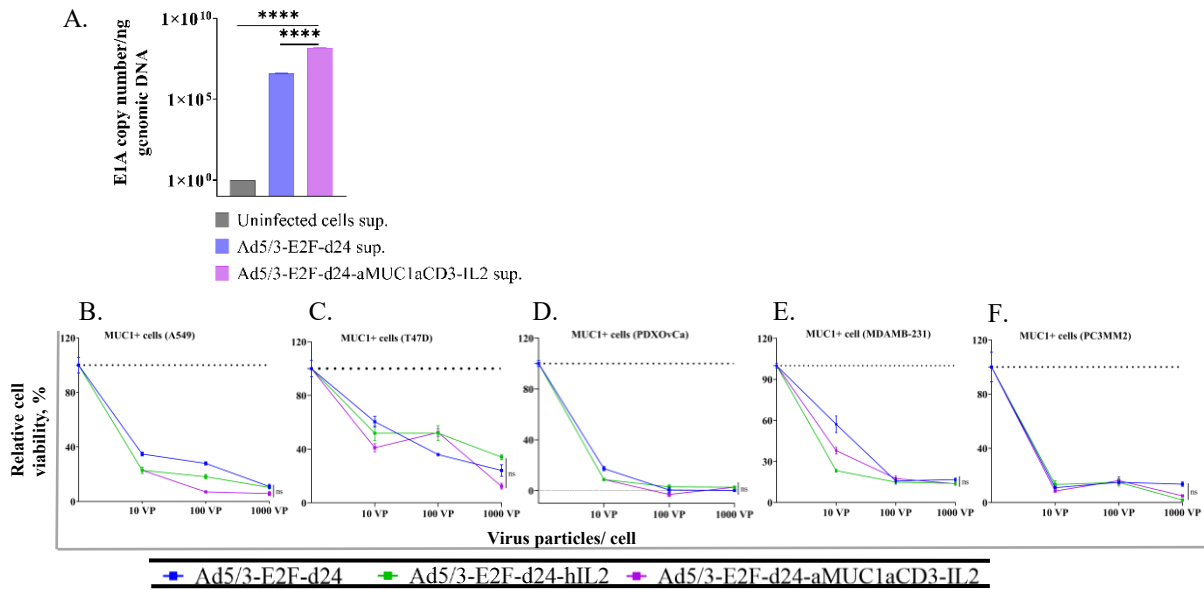

**Figure S1. Oncolytic activity of TILT-322 *in vitro*.** (A) Quantification of E1A gene copy number as a measure of virus replication in TILT-322 infected A549 cells supernatant. (B-F) Relative cell viability of human cancer cells followed by the infection of Ad5/3-E2F-d24, Ad5/3-E2F-d24-hIL2, and TILT-322 virus different concentration of virus ranging from 10, 100 or 1000 VP/ cell. Cells were incubated with the viruses for 3 days (A549, PDX-OvCa, and MDAMB-231), 5 days (PC3MM2), or 7 days (T47D) before determining cell viability. The untreated control group is indicated by the dashed line.

All experiments were run in quadruplet, and the resulting data are presented as mean  $\pm$  SEM. One-way ANOVA with Tukey's post hoc test was used to compare more than two groups in the activation assay. Statistical significance is represented as \* $p < 0.05$ , \*\*\* $p < 0.001$ , \*\*\*\* $p < 0.0001$  and ns = non-significant.

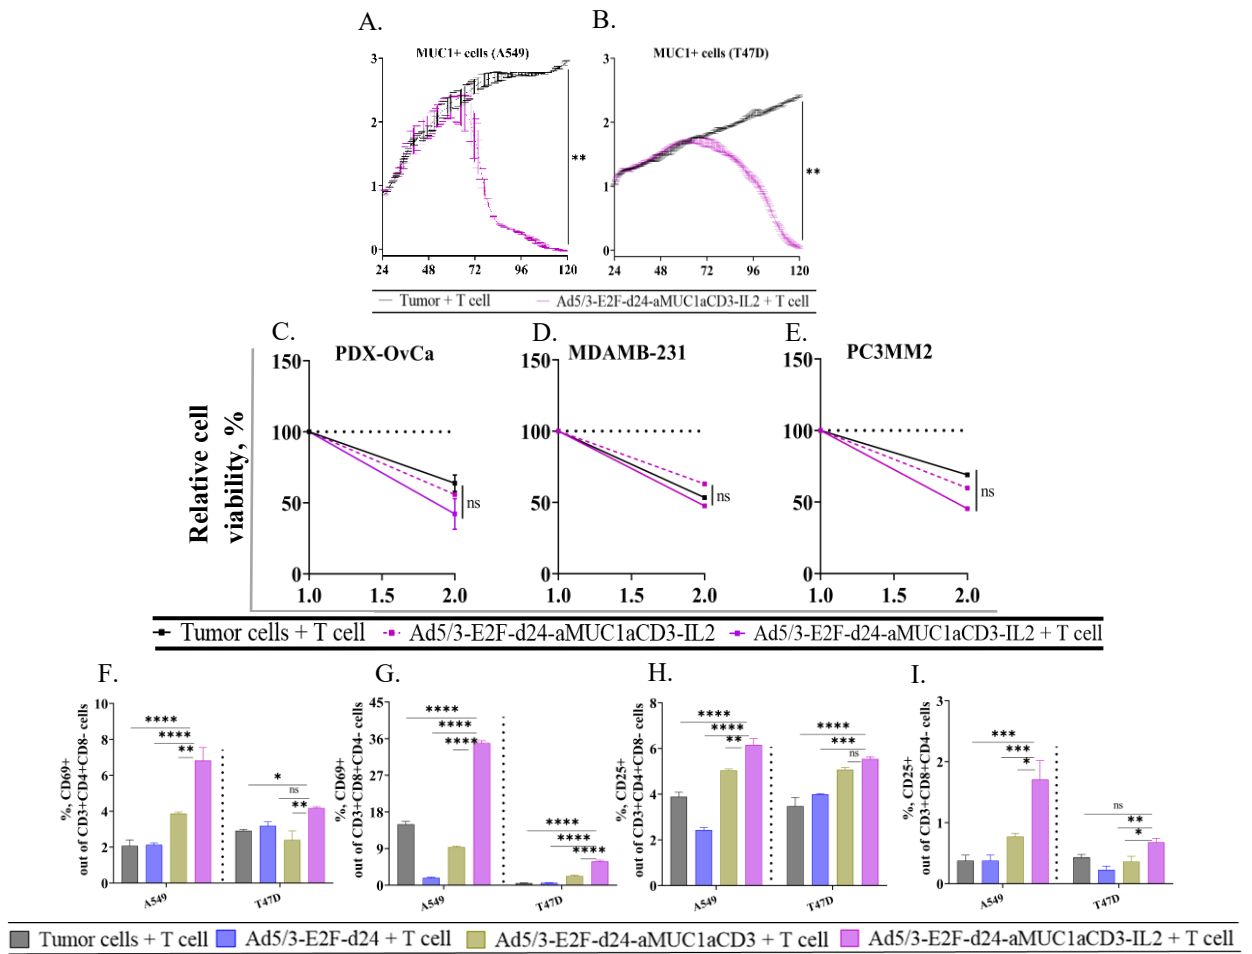

**Figure S2. TILT-322 mediated tumor cell killing and T cell activation *in vitro*.**

Real-time iCELLigence-based cytotoxicity assay showing the killing of MUC1-positive (A) A549 and (B) T47D tumor cells in the presence of virus and T cells at E:T ratio of 1 for up to 120 hours. (C-E) Evident of faster tumor cell killing by TILT-322 in the presence of unstimulated human CD3<sup>+</sup> cells at E:T ratio of 5 and 1 pfu/cell virus concentration 48 hours post-infection. (F-G) Percentage of activated CD69<sup>+</sup> and (H-I) CD25<sup>+</sup> lymphocytes in TILT-322 treated tumors. All experiments were run in quadruplet, and the resulting data are presented as mean  $\pm$  SEM. Welch's t-test was used to determine statistical significance in the iCELLigence assay and one-way ANOVA with Tukey's post hoc test was used to compare more than two groups in the activation assay. Statistical significance is represented as \*p < 0.05, \*\*\*p < 0.001, \*\*\*\*p < 0.0001 and ns = non-significant. Statistical significance in xCELLigence assay is represented as \*p = 0.0282, and \*\*p = 0.0057.

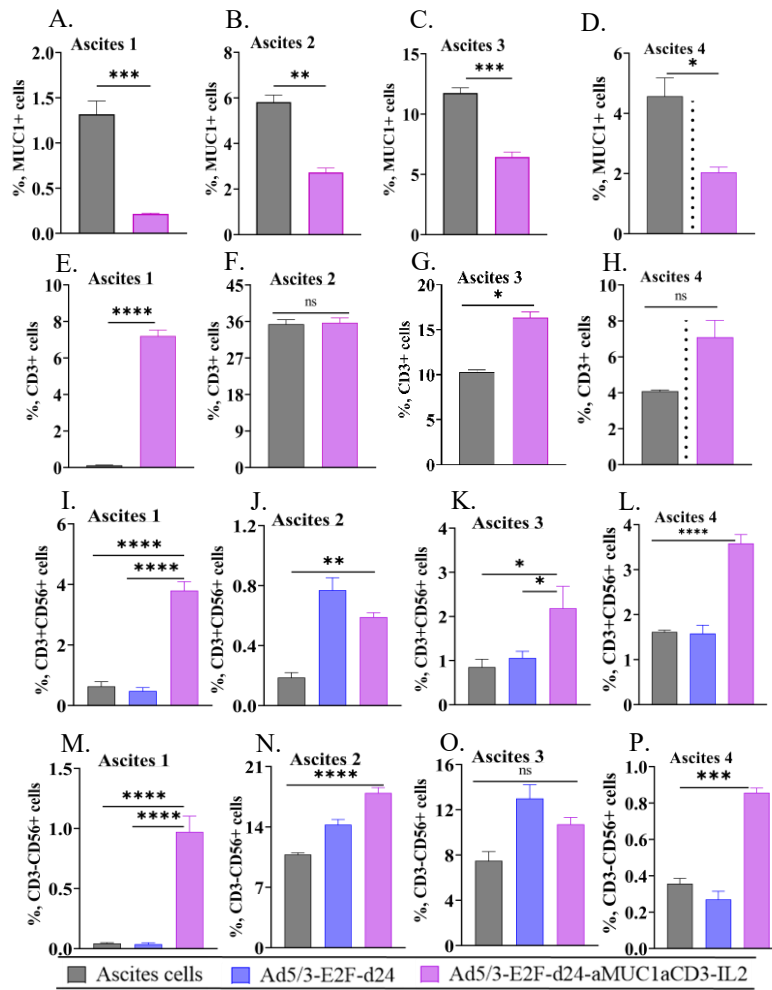

**Figure S3. Detection of MUC1, T cells, and other cells followed by TILT-322 infection in ascites samples. (A-D)** Detection of reduced proportion of MUC1 antigen in ascites cells and **(E-H)** Total percentage of CD3+ T cell detected in ascites samples **(I-L)** Total percentage of CD3+CD56+ cells and **(M-P)** CD3-CD56+ NK cells followed detected in four ascites samples infected with TILT-322 virus. The resulting data are presented as mean  $\pm$  SEM of quadruplet. One-way ANOVA with Tukey's post hoc test was used to run the statistical significance and the result is represented as \* $p < 0.05$ , \*\* $p < 0.01$ , \*\*\* $p < 0.001$ , and \*\*\*\* $p < 0.0001$ .

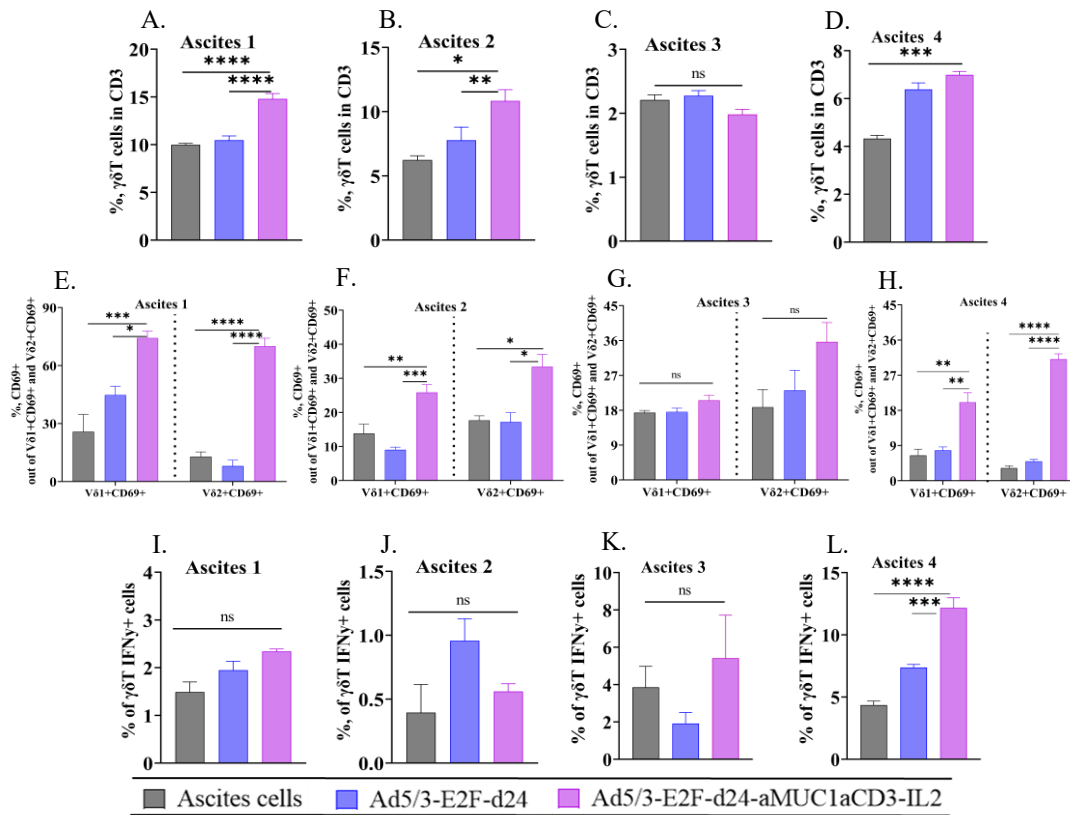

**Figure S4. TILT-322 mediated activation of  $\gamma\delta$ T cell.**

The graph shows the percentage of (A-D)  $\gamma\delta$  T cells and (E-H) Percentage of activated CD69+ cells among the V $\delta$ 1+ and V $\delta$ 2+ subsets. (I-L) Interferon-gamma positive  $\gamma\delta$  T cells in all three tested ascites samples infected by TILT-322. The resulting data are presented as mean  $\pm$  SEM of quadruplet. One-way ANOVA with Tukey's post hoc test was used to run the statistical significance is represented as \*\*\*p < 0.001, \*\*\*\*p < 0.0001 and, ns = non-significant.

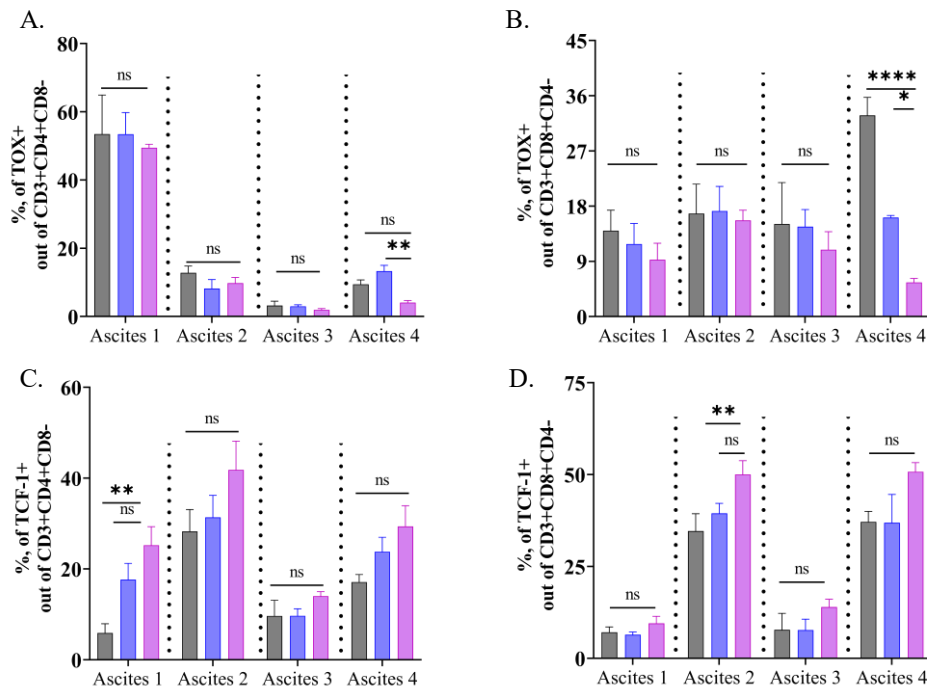

**Figure S5. T cell exhaustion at the transcriptional level followed by the TILT-322 treatment.** The graph shows the percentage of (A-B) TOX+ cells and (C-D) TCF-1+ cells on CD4+ and CD8+ T cells followed by TILT-322 treatment in four different ascites samples. The resulting data are presented as mean  $\pm$  SEM of quadruplet. One-way ANOVA with Tukey's post hoc test was used to run the statistical significance is represented as \*\*\* $p < 0.001$ , \*\*\*\* $p < 0.0001$  and, ns = non-significant.



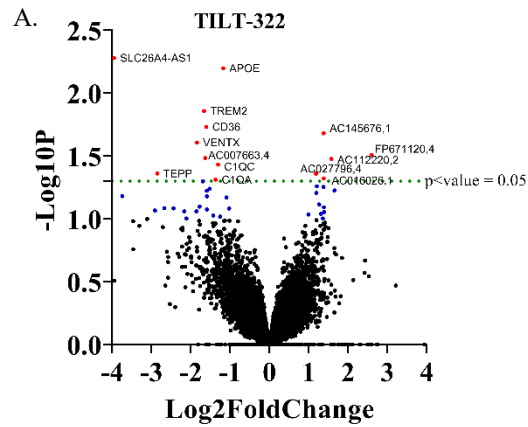

**Figure S6. Differentially expressed genes in TILT-322 infected ascites cells.** TILT-322 infection of ovarian ascites samples led to downregulation of 14 and upregulation of 5 differentially expressed genes in ascites samples.

A.

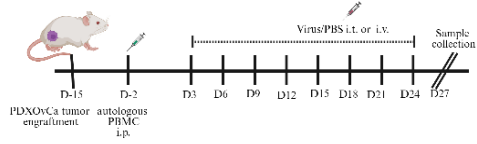

| Group                       | Dose                 | Route           |
|-----------------------------|----------------------|-----------------|
| PBMC                        | 1 x 10 <sup>7</sup>  | Intraperitoneal |
| Ad5/3-E2F-d24               | 1 x 10 <sup>9</sup>  | Intratumoral    |
| Ad5/3-E2F-d24 aMUC1aCD3     | 1 x 10 <sup>9</sup>  | Intratumoral    |
| Ad5/3-E2F-d24 aMUC1aCD3-IL2 | 1 x 10 <sup>9</sup>  | Intratumoral    |
| Ad5/3-E2F-d24 aMUC1aCD3-IL2 | 1 x 10 <sup>10</sup> | Intravenous     |

B.

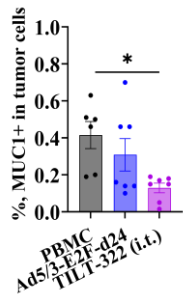

C.

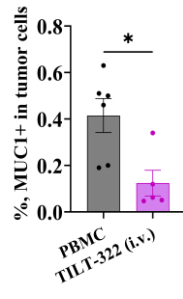

D.

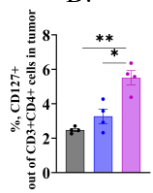

E.

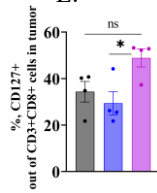

F.

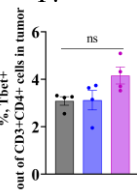

G.

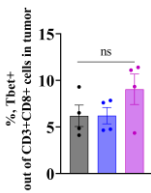

H.

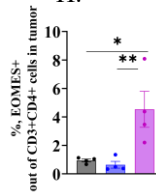

I.

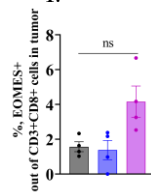

• PBMC  
• Ad5/3-E2F-d24  
• TILT-322 (i.t.)

J.

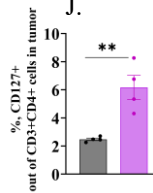

K.

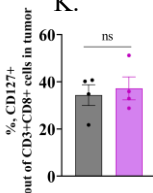

L.

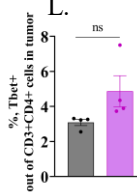

M.

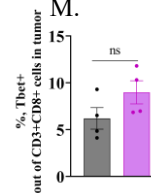

N.

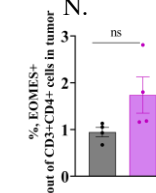

O.

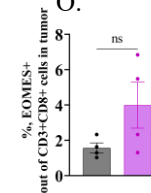

• PBMC  
• TILT-322 (i.v.)

**Figure S7. Schedule for the treatment of TILT-322 *in vivo* experiment and immunological analysis of animal tumor samples.** (A) Schematic representation of TILT-322 animal experiment with dosage information. (B) Total percentage of MUC-1 positive cells detected in TILT-322 virus-treated tumors with intratumoral and (C) intravenous delivery. Total percentage of (D-E) CD127+ cells, (F-G) T-bet+ cells, (H-I) EOMES+ cells on CD4+ or CD8+ T cells in *in vivo* tumor samples followed by the local delivery of TILT-322. When the TILT-322 was given systemically, the total percentage of (J-K) CD127+ cells, (L-M) T-bet+ cells, (N-O) EOMES+ cells on CD4+ or CD8+ T cells in *in vivo* tumor samples is shown. The resulting data are presented as mean  $\pm$  SEM of quadruplet. One-way ANOVA with Tukey's post hoc test was used to run the statistical significance is represented as \*\*\*p < 0.001, \*\*\*\*p < 0.0001, and, ns = non-significant.

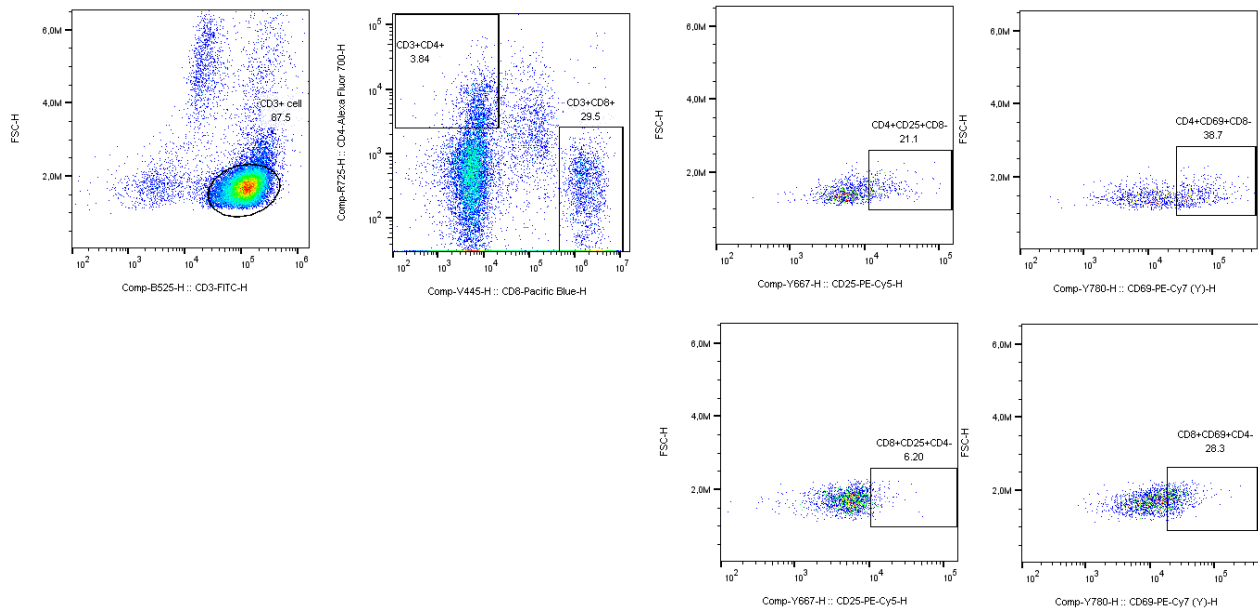

**Figure S8. Flow gating strategy used to access activated CD69 and CD25 T cells *in vitro*.** Gating is done from lymphocytes  $\rightarrow$  CD3  $\rightarrow$  CD4  $\rightarrow$  CD69+/CD25+ or CD3  $\rightarrow$  CD8  $\rightarrow$  CD69+/CD25+.

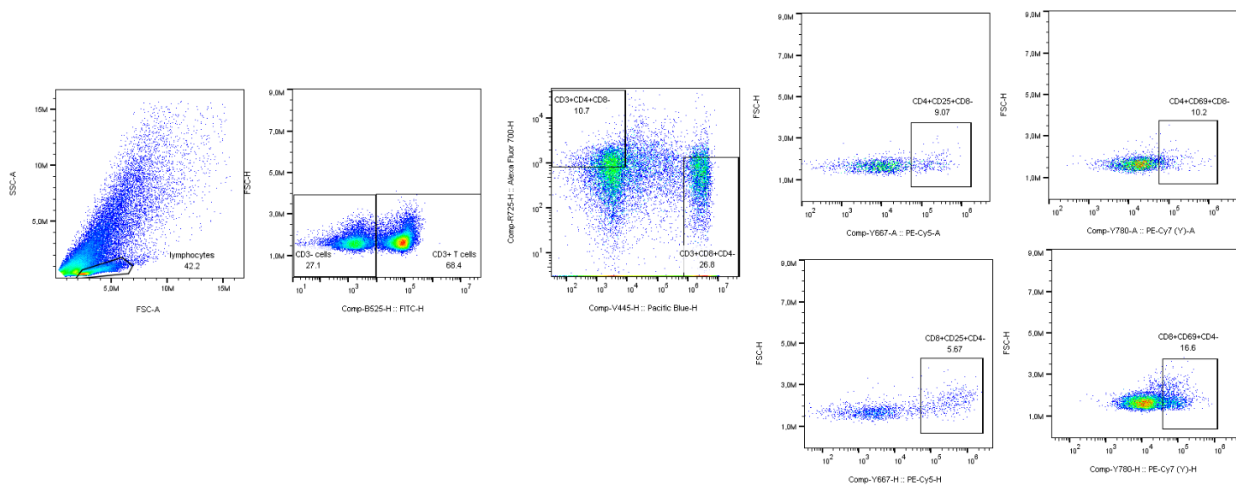

**Figure S9. Flow gating strategy used to access activated CD69 and CD25 T cell *ex vivo*.** Gating is done from lymphocytes  $\rightarrow$  CD3+  $\rightarrow$  CD4+  $\rightarrow$  CD69+/CD25+ or  $\rightarrow$  CD3+  $\rightarrow$  CD8+  $\rightarrow$  CD69+/CD25+.

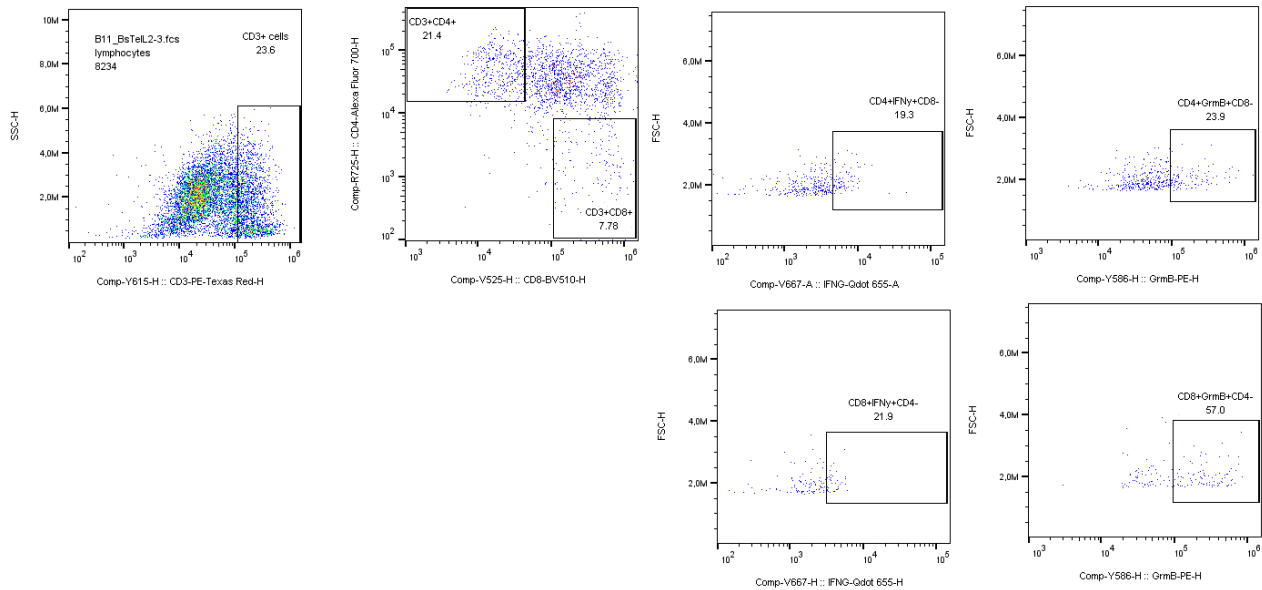

**Figure S10. Flow Gating Strategy used to access granzymeB and interferon-gamma positive cells in TILT-322 infected ascites samples.** Gating is done from lymphocytes  $\rightarrow$  CD3+  $\rightarrow$  CD4+  $\rightarrow$  GranzymeB+/Interferon- $\gamma$ + or  $\rightarrow$  CD3+  $\rightarrow$  CD8+  $\rightarrow$  GranzymeB+/Interferon- $\gamma$ +

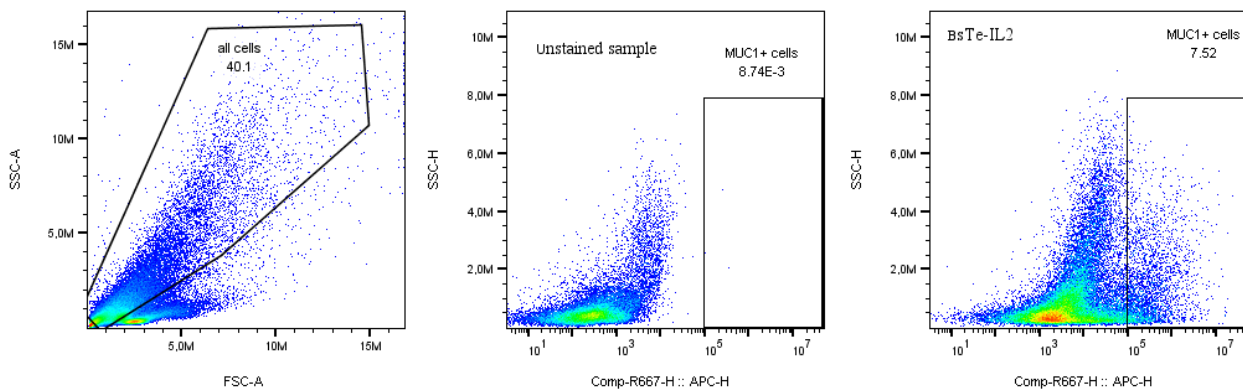

**Figure S11. Flow Gating Strategy used to access MUC1+ cells out of all ascites cells.** Gating is done from all cells  $\rightarrow$  MUC1. MUC1 Fluorescence Minus One Control and unstained sample control were used to set the gating thresholds.

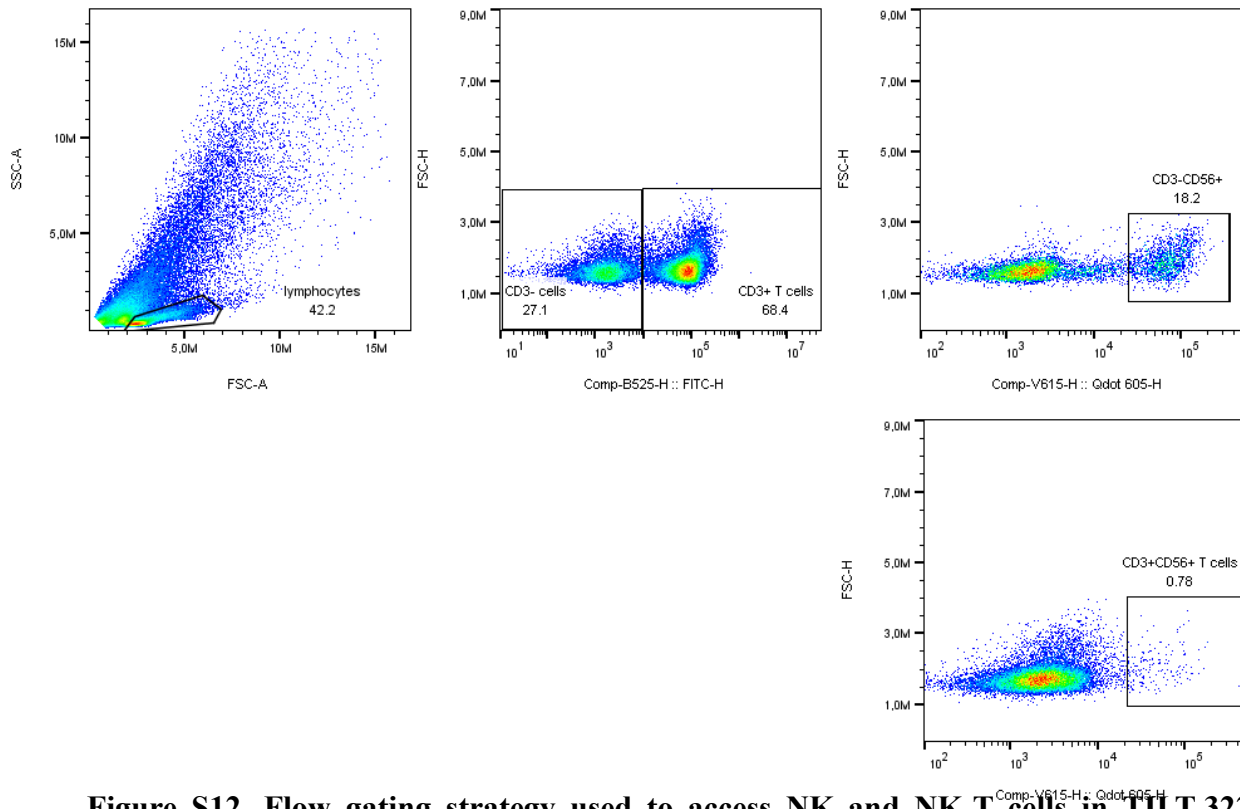

**Figure S12. Flow gating strategy used to access NK and NK-T cells in TILT-322 infected ascites samples.** Gating is done from lymphocytes → CD3+ cells → CD3+CD56+ cells or lymphocytes → CD3- cells → CD3-CD56+ cells. All required Fluorescence Minus One Control and unstained sample control was used to set the gating thresholds.

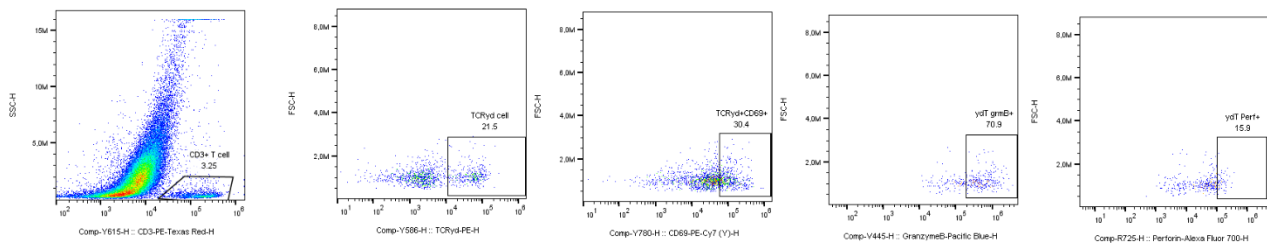

**Figure S13. Flow gating strategy used to access TCR gamma delta T cell activation in TILT-322 treated ascites samples *ex vivo*.** Gating is done from lymphocytes → CD3+ cells → TCRyd+ cells → CD69+ cells/ granzymeB+ / Perforin+ cells. All required Fluorescence Minus One Control and unstained sample control was used to set the gating thresholds.

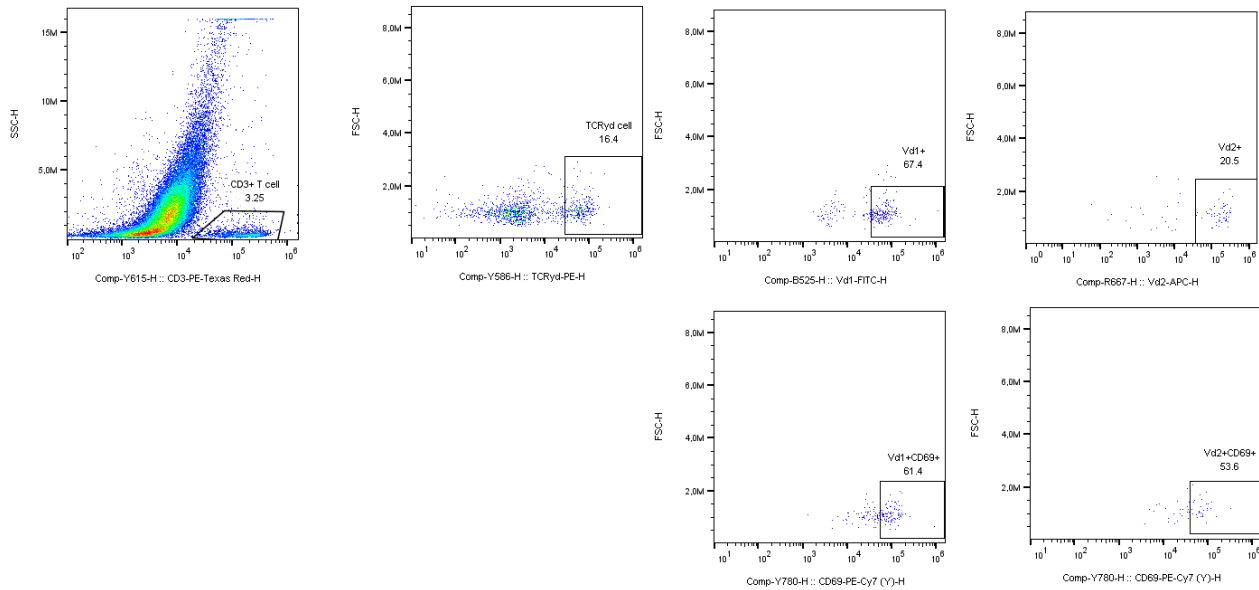

**Figure S14. Flow gating strategy used to access Vd1/Vd2 gamma delta T cell subset activation.** Gating is done from lymphocytes → CD3+ cells → TCRyd+ cells → Vd1+cells → CD69+ or lymphocytes → CD3+ cells → TCRyd+ cells → Vd2+cells → CD69+ cells. All required Fluorescence Minus One Control and unstained sample control was used to set the gating thresholds.

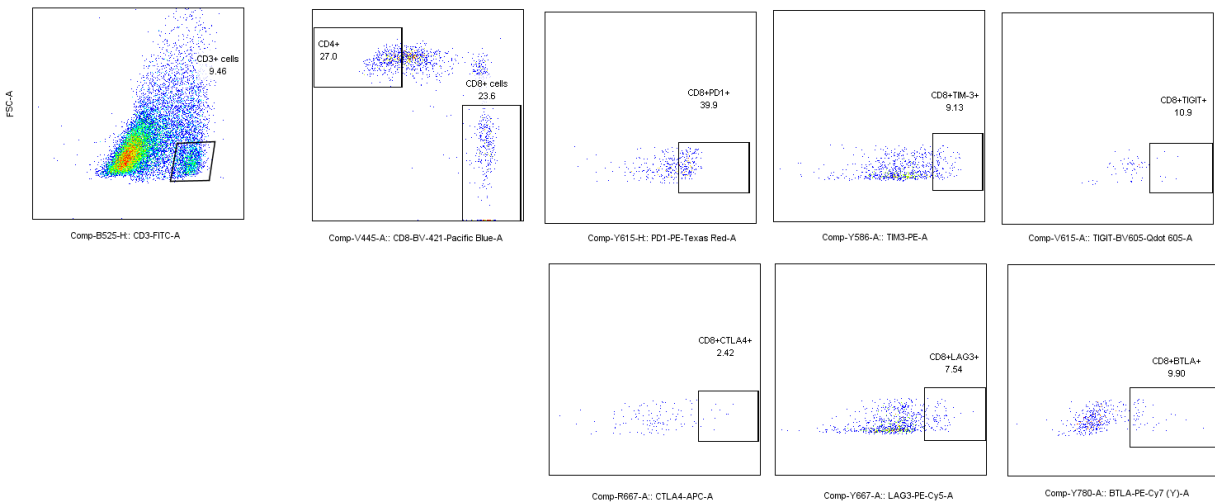

**Figure S15. Flow gating strategy used to examine T cell exhaustion in ovarian ascites followed by the TILT-322 treatment.** Gating is done from CD3+ cells → CD4+ → BTLA/CTLA-4/LAG-3/PD-1/TIGIT/TIM-3. A similar gating is done to access the expression on CD8+ T cells (CD3+ cells → CD8+ → BTLA/CTLA-4/LAG-3/PD-1/TIGIT/TIM-3). All required Fluorescence Minus One Control and unstained sample control was used to set the gating thresholds.
